1 **Contrasting adaptation and optimization of stomatal traits across**  
2 **communities at continental-scale**

3 **Running title:** Stomatal trait distributions

4

5 Congcong Liu<sup>1,2</sup>, Lawren Sack<sup>3</sup>, Ying Li<sup>1</sup>, Nianpeng He<sup>1,2\*</sup>

6 <sup>1</sup> Key Laboratory of Ecosystem Network Observation and Modeling, Institute of Geographic  
7 Sciences and Natural Resources Research, Chinese Academy of Sciences, Beijing 100101,  
8 China;

9 <sup>2</sup> University of Chinese Academy of Sciences, Beijing 100049, China

10 <sup>3</sup> Department of Ecology and Evolutionary Biology, University of California, Los Angeles,  
11 90025, USA

12

13 \*Correspondence author Nianpeng He (henp@igsnr.ac.cn)

14

15

16 **Abstract**

17 The maximum stomatal conductance ( $g$ ), a major anatomical constraint on plant productivity,  
18 is a function of the stomatal area fraction ( $f$ ) and stomatal space-use efficiency ( $e$ ). However,  $f$   
19 and  $g$  have been considered as equivalents, with  $e$  rarely considered, and their adaptation to  
20 the environment and their regulation of ecosystem productivity are unclear. Here, we analyzed  
21 the community-weighted mean, variance, skewness, and kurtosis of stomatal traits from  
22 tropical to cold-temperature forests. The variance of  $g$  and  $f$  was higher for arid sites,  
23 indicating greater functional niche differentiation, whereas that for  $e$  was lower, indicating  
24 convergence in efficiency. Besides, when other stomatal trait distributions remained  
25 unchanged, increasing kurtosis but decreasing skewness of  $g$  would improve ecosystem  
26 productivity, and  $f$  showed the opposite patterns. These findings highlight how the relative  
27 importance and equivalence of inter-related traits can differ at community scale.

28

29 **Keywords:** stomata; community-weighted method; community, adaptation; ecosystem  
30 productivity.

31

32

### 33 **Introduction**

34 Stomata are micropores on the leaf surface that regulate the exchange of water vapor and CO<sub>2</sub>  
35 between plants and the atmosphere (Edwards et al., 1998; Hetherington and Woodward, 2003).  
36 Indeed, the evolution of stomata was necessary for plants to colonize terrestrial ecosystems  
37 and the diversification of stomatal traits enables plants to inhabit a wide range of  
38 environments (Haworth et al., 2011; Raven, 2002). The numbers of stomatal pores, and their  
39 area and depth determine the maximum stomatal conductance ( $g$ ), which represent an  
40 anatomical constraint on the maximum rates of diffusion of carbon and water, and thereby  
41 their fluxes in given environments. Indeed, given that there is a close relationship between  $g$   
42 and field-measured stomatal conductance (McElwain et al., 2016; Murray et al., 2019;  
43 Xiong and Flexas, 2020), and  $g$  has been used to predict water vapor and CO<sub>2</sub> fluxes  
44 (Franks and Beerling, 2009; McElwain et al., 2016; Sack and Buckley, 2016). In turn,  $g$  can be  
45 considered a product of the fraction of leaf epidermal space that is allocated to the stomata  
46 (the stomatal area fraction;  $f$ ) and the stomatal space-use efficiency ( $e$ ), which is a function of  
47 stomatal size (see Methods). The  $f$  is more properly an index of the combined costs associated  
48 with the construction, operation and maintenance of the stomata, but it is often taken as a  
49 proxy for  $g$  (Holland and Richardson, 2009; Liu et al., 2018; Sack et al., 2003), especially as  $g$   
50 and  $f$  are theoretically and empirically correlated with each other (de Boer et al., 2016;  
51 Franks and Beerling, 2009). Yet the relative importance and the equivalence of these traits have  
52 not been tested at a large scale.

53       The importance of  $g$  and its determinants is especially critical for the understanding of  
54 the adaptation of diverse species of communities across gradients of aridity. A rich literature

55 shows contrasting trait values enables co-occurring species to exploit different resources, or  
56 the same resources on contrasting spatial or temporal scales (Gross et al., 2017; Hooper, 1998;  
57 Hooper et al., 2005), resulting in species-variation in tolerances of scarcity, e.g., drought  
58 (Grossiord, 2020), as well as facilitation (Callaway, 1995) and “selection effects”, i.e.,  
59 differential contribution to the community-weighted trait values (Loreau, 2000). Indeed, traits  
60 that contribute to resource partitioning, such as root stratification (Schwendenmann et al.,  
61 2015) or differential stomatal regulation (West et al., 2012) can contribute not only to the  
62 mechanisms by which plants tolerate drought but also can improve species-specific soil  
63 moisture status by reducing competition for water among species. As a composite stomatal  
64 trait,  $g$  is coordinated with other plant hydraulic traits (Sack et al., 2003). Generally, a higher  $g$   
65 should benefit species under selection for high productivity or competition (Sack and Buckley,  
66 2016; Taylor et al., 2012), and thus, in communities with high water availability, we expected  
67 narrower functional niche differentiation of  $g$  than in communities of drier regions. Indeed,  
68 because plants can tolerate drought by maintaining low rates of water uptake and productivity  
69 as soils dry, i.e., “tolerance” and/or by achieving their growth primarily when water is  
70 available, i.e., “avoidance” (Grubb, 1998; Hetherington and Woodward, 2003), we  
71 hypothesized that  $g$  values, which influence water uptake and productivity, would tend to be  
72 more variable in communities of drier regions. Notably, as  $g$  depends on  $f$  and  $e$ , where  $g$  is a  
73 proxy for the benefit of assimilated carbon, and  $f$  represents the cost of stomatal construction,  
74 maintenance and spatial allocation (de Boer et al., 2016), therefore  $e$ , which is  $g/f$ , is a  
75 benefit-cost ratio, i.e., the maximum amount of  $\text{CO}_2$  that can diffuse through a unit of  
76 stomatal area per unit time. We thus hypothesized that that variability of  $e$  within communities

77 would be strongly constrained under water scarcity.

78           Stomatal traits may be a model for plant traits that are important in determining  
79 ecosystem functions, as this role of traits has become a priority topic in ecological research  
80 (Reichstein et al., 2014). The effect of species' traits aggregated at ecosystem scale is typically  
81 quantified using to the mass ratio hypothesis or the niche complementarity hypothesis.  
82 According to the mass ratio hypothesis the extent to which the trait of a given species affects  
83 ecosystem properties depends on its relative contribution to the total community biomass  
84 (Garnier et al., 2004), and many studies found correlations between ecosystem functions and  
85 community-weighted mean (CWM) values of plant traits (Garnier et al., 2004; Griffin-Nolan  
86 et al., 2018; MuscarellaandUriarte, 2016). According to the niche complementarity hypothesis,  
87 resource niches may be used more completely when a community is functionally more  
88 diverse (SchumacherandRoscher, 2009), and many studies reported that ecosystem function  
89 can be predicted by niche complementarity of traits, as quantified using community-weighted  
90 variance, skewness, or kurtosis of trait values (Gross et al., 2017; Le Bagousse-Pinguet et al.,  
91 2017; Liu et al., 2020; Mensah et al., 2020; Zhang et al., 2019). Indeed, the global vegetation  
92 models predict ecosystem production based on the mean values of traits. It is still a missing  
93 picture that how trait distributions influence the prediction. Although stomatal traits are  
94 expected to influence ecosystem productivity given their essential role in controlling leaf  
95 water and CO<sub>2</sub> fluxes (HetheringtonandWoodward, 2003; Wang et al., 2015), no studies have  
96 tested the relative importance of the distributions of stomatal traits (including  
97 community-weighted mean, variance, skewness, and kurtosis) in predicting ecosystem  
98 productivity across communities. We hypothesized a strong importance of these community

99 distribution metrics for  $g$  and potentially for its components,  $f$  and  $e$ , for regulating ecosystem  
100 productivity at community scale.

101 We analyzed the community-weighted mean, variance, skewness, and kurtosis and  
102 relationships among these statistical moments, for  $g$ ,  $f$  and  $e$  for 800 plant species from nine  
103 sites along a climatic gradient. We hypothesized that the community-weighted variance in  $g$   
104 would increase with aridity, due to variability of  $f$ , rather than  $e$ . We also hypothesized that  
105 functional niche differentiation of  $g$  would be stronger for communities at higher aridity, and  
106 tested whether trait assembly of stomata followed the general assembly rule for maximization  
107 of trait diversity previously reported for drylands globally using specific leaf area and  
108 maximum plant height (Gross et al., 2017). We also hypothesized that stomatal distributions  
109 would predict differences in productivity across ecosystems.

110

## 111 **Results**

### 112 **Relationships between stomatal trait moments and climate**

113 Stomatal traits were closely related to temperature, precipitation, and climatic aridity  
114 (Fig. 1). Overall, the relationships of community-weighted trait means and variances with  
115 climate variables were stronger than those of community-weighted skewness and kurtosis,  
116 and the aridity index was a stronger predictor of stomatal traits than temperature and  
117 precipitation. The community-weighted means and variances of  $g$  and  $f$  were strongly  
118 positively associated with climatic aridity whereas those of  $e$  were negatively associated with  
119 climatic aridity (Fig. 2).

120 The correlations between community-weighted variance and kurtosis were also tested

121 (Fig. S1). For  $g$  and  $f$ , the community-weighted variance and kurtosis were negatively  
122 correlated; such correlations were not observed with  $e$ . At drier sites,  $g$  generally showed  
123 larger variance with lower kurtosis, whereas communities of wetter sites generally had  
124 smaller variance with a wide range of kurtosis.

125

### 126 **Skewness-kurtosis relationships (SKR) and random expectations**

127 In most cases, the distributions of stomatal traits differed substantially from normality (Fig. 3).  
128 The community-weighted skewness<sup>2</sup> and kurtosis of these three stomatal traits were strongly  
129 positively related. The skewness and kurtosis values generated by the null model were located  
130 within the constraint triangle imposed by the inequality  $\text{Kurtosis} \geq \text{Skewness}^2 + 1$ . The  
131 observed empirical skewness-kurtosis relationships (SKR) for  $g$  deviated strongly from the  
132 predictions of the two null models, with the slopes ( $\beta$ ) were higher and intercepts ( $\alpha$ ) lower  
133 than would be expected by chance, based on Monte Carlo analyses (Table S6). The observed  
134 kurtosis values for both  $g$  and  $f$  were significantly closer than expected by chance to the lower  
135 boundary of the mathematical constraint triangle. In other words, after controlling for the  
136 degree of skewness of  $g$  and  $f$ , observed kurtosis within communities was minimal.  
137 Skewness-kurtosis relationships for  $e$  did not differ statistically from those generated by the  
138 two null models; thus, the D of  $e$  was not smaller than expected (Fig. 3).

139 Although the skewness-kurtosis relationships of  $g$  and  $f$  cannot be explained by chance,  
140 the D of  $g$  and  $f$  was also influenced by climate. Specifically, drier communities had lower D  
141 values for  $g$  and  $f$ , while for  $e$  the D values showed no climatic trends (Fig. 4).

142

143 **Stomatal trait moments and ecosystem productivity**

144 The distributions of stomatal traits regulated ecosystem productivity (Fig. 5). The amount of  
145 variance in ecosystem productivity explained by community-weighted skewness and kurtosis  
146 was greater than that explained by community-weighted mean and variance.

147 Community-weighted skewness and kurtosis of  $g$  and  $f$  played different roles in optimizing  
148 ecosystem productivity: If the other independent variables were fixed, increasing the  
149 skewness of  $f$  but decreasing that of  $g$ , and increasing the kurtosis of  $g$  but decreasing that of  $f$   
150 would improve ecosystem productivity (Fig. 6). Further, ecosystem productivity increased  
151 across communities positively with the mean of  $e$ .

152 Overall stomatal traits explained up to 66% of the total variation observed in ecosystem  
153 productivity, which was greater than that explained by the distributions of stomatal traits  
154 generated by the two null models (Fig. S2).

155

156 **Discussion**

157 **Maximum stomatal conductance ( $g$ ) increases with climatic aridity at continental scale**

158 The linkage of  $g$  with low water availability has remained controversial. Indeed, plants  
159 may adapt to dry conditions with a low  $g$  that may enable sustained low rates of gas exchange  
160 under extended periods of lower water supply, with increased CO<sub>2</sub> gain relative to water loss,  
161 i.e., higher water use efficiency (Franks et al., 2015). However, some studies have proposed a  
162 higher  $g$  and stomatal conductance can confer an advantage for plants in arid climates,  
163 enabling greater rates of photosynthesis in the shorter “pulses” when water is available  
164 (Grubb, 1998; Scoffoni et al., 2011; Wang et al., 2017), and thus “avoiding” drought with



165 opportunistic rapid growth during short periods of water availability. One of the major novel  
166 findings of this study was that the community-weighted mean value of  $g$  was positively  
167 related to climatic aridity across the continent, and thus that pulse-driven “avoidance” is the  
168 dominant trend for adaptation of communities with low water availability. Our findings  
169 extend to continental scale the hypothesis that plants and communities adapted to arid  
170 climates would generally maintain a low stomatal conductance, but given their high  
171 maximum stomatal conductance, can sharply increase stomatal conductance during pulses of  
172 rainfall availability to maximize growth (Grubb, 1998). This hypothesis is also consistent with  
173 reports that species with higher  $g$  tend to show greater sensitivity to changes in the external  
174 environment (Haworth et al., 2018; Siddiq et al., 2017).

175

#### 176 **Greater functional niche differentiation of $g$ under higher climatic aridity**

177 Environmental stress can restrict the variance of trait values, leading to convergence in  
178 the distribution of trait values among coexisting species (Kraft et al., 2008). Yet, for  
179 communities across a continental scale aridity gradient, the community-weighted variance of  
180  $g$  increased with climatic aridity. Notably, this difference for  $g$  would be expected due to the  
181 ability of plants to close stomata; species with a high  $g$  are not obliged to maintain high  
182 stomatal conductance during stressful periods, as species with large stomatal pores areas can  
183 sharply reduce stomatal conductance and thus transpiration rates. The distance between  
184 observed kurtosis and minimum kurtosis ( $D$ ) for  $g$  was lower than that generated by two null  
185 models (Table S1), consistent with a general assembly rule that trait diversity of  $g$  is  
186 maximized within forest plant communities, as previously demonstrated for global drylands in

187 analyses of specific leaf area and maximum height (Gross et al., 2017). Further, the  $D$  values  
188 of  $g$  was lower for drier communities, suggesting that this assembly rule applies more  
189 strongly with increasing aridity. Similarly to root stratification (Oram et al., 2018), diversity in  
190  $g$  and associated stomatal regulation strategies might improve species-specific soil moisture  
191 status (West et al., 2012) and increase species partitioning water resources in space and/or  
192 time, thus increasing overall water utilization (Naeem et al., 1994). We observed a negative  
193 relationship between community-weighted variance and kurtosis of  $g$  (Fig. S1); communities  
194 characterized by low variance and low kurtosis values were only observed in the wetter  
195 regions, indicating that community assembly process of  $g$  was more strictly constrained under  
196 lower water availability. The strong patterns linking the stomatal traits of communities with  
197 climate at continental scale highlights the importance of these traits across the background of  
198 other structural and physiological adaptations to aridity, including specialized xylem anatomy,  
199 plant allometry, rooting strategy, dormancy and the ability to recover after dieback (Grossiord,  
200 2020).

201

## 202 **Limited variability of stomatal space-use efficiency ( $e$ ) under water scarcity**

203 Stomatal space-use efficiency ( $e$ ) was first defined in this study, and, by contrast with  $g$   
204 and  $f$ , community-weighted mean values of  $e$  were not statistically constrained by climatic  
205 aridity, supporting theory that this efficiency should be generally maximized  
206 (Franks and Beerling, 2009). For  $g$  and  $f$ , the overall negative correlation community-weighted  
207 mean trait values with aridity was consistent with the expected trends based on adaptation  
208 (Garnier and Navas, 2012; Garnier et al., 2004; Grime, 1998). Likewise, given that

209 community-weighted mean values of  $e$  were highly conservative, the narrow  
210 community-weighted variance of  $e$  would reflect adaptation in which co-occurring species  
211 tend to converge in  $e$  to a narrow range of optimal values. Our results supported the  
212 hypothesis that the variability of  $e$  was especially strongly constrained under arid climates,  
213 consistent with the expectation of greater cost-effectiveness of investment in stomata under  
214 lower water availability than under high water availability, where selection would likely be  
215 weaker.

216

### 217 **Coordinated adaptation of $g$ and $f$ across a climatic gradient**

218 For both  $g$  and  $f$ , the community-weighted mean and variance increased with the climatic  
219 aridity, whereas  $D$  decreased, and the trait diversity was maximized. Thus, the distributions of  
220  $g$  and  $f$  were synchronous in adapting to the environment. Given that  $g$  is determined as the  
221 product of  $f$  and  $e$ , and that variation in  $g$  was primarily caused by  $f$  rather than  $e$ , it is clear  
222 that the shifts in stomatal area fraction are more typical for the adaptation and assembly of  $g$   
223 than shifts in  $e$ , which remains constrained. As  $e$  is inversely proportional to stomatal size (see  
224 Supplementary Note 1 for detailed information), its constraint is consistent with previous  
225 studies reporting that stomatal size is less variable than stomatal density or  $f$  (Beaulieu et al.,  
226 2008; Jordan et al., 2015; Xiong and Flexas, 2020).

227

### 228 **Contrasting roles of $g$ and $f$ in optimizing ecosystem productivity**

229 Selection for higher  $g$  (the benefit) involves a trade-off to minimize  $f$  (the cost) (de Boer et al.,  
230 2016), and such cost-benefit relationship is also involved in how stomatal traits regulate

231 ecosystem productivity. Decreasing the skewness of  $g$  and increasing the skewness of  $f$  meant  
232 that species with high  $g$  and/or low  $f$  values were more dominant within communities; thus,  
233 the optimization of stomata on ecosystem productivity was economical through decreasing the  
234 skewness of  $g$  and increasing the skewness of  $f$ . A previous study also argued that high  
235 kurtosis in leaf traits indicated strong trait optimization (Umaña et al., 2021). Here, the high  
236 kurtosis of  $g$  meant that co-occurring species of  $g$  were convergent toward an optimal value.  
237 Nevertheless, the high kurtosis and lower skewness of  $g$  coupled with lower kurtosis and  
238 higher skewness of  $f$  would result in improved  $e$ , i.e., the benefit-cost ratio (de Boer et al.,  
239 2016), which was positively correlated with ecosystem productivity. Therefore, contrasting  
240 regulations of  $g$  and  $f$  on ecosystem productivity were associated with stomatal cost-benefit  
241 relationship.

242

## 243 **Materials and Methods**

### 244 **Study sites and climate data**

245 Nine study sites were selected along the 3700-km north–south transect of China  
246 (NSTEC), which were designated as Huzhong, Liangshui, Changbai, Dongling, Taiyue,  
247 Shennongjia, Jiulian, Dinghu, and Jianfengling. The nine study sites extend from 18.7 °N to  
248 51.8 °N latitude, and represent examples of most of the forest types in the northern  
249 hemisphere, including cold-temperate coniferous forest, temperate deciduous forest,  
250 subtropical evergreen forest, and tropical rain forest (He et al., 2019). Along the NSTEC  
251 transect, the mean annual temperature (MAT) ranges from –3.67 to 23.2 °C, and mean annual  
252 precipitation (MAP) from 472 to 2266 mm (He et al., 2020). Soil types range from

253 cold-temperate brown soils with high organic matter content to tropical red soils with low  
254 organic matter content.

255

## 256 **Sample collection and analysis**

257 The field survey was conducted in July–August 2013, the peak period of growth for all  
258 species. Sampling plots were located within well-protected national nature reserves with  
259 relatively continuous vegetation, which is representative of the given forests. Three or four  
260 experimental plots (30 m × 40 m) located least 100 m apart were established in each site.  
261 Geographical information (latitude, longitude, and altitude), plant species composition, and  
262 community structure were recorded for each plot. The number, height, diameter at breast  
263 height (DBH) of trees, basal stem diameter of shrubs, and aboveground live-biomass of all  
264 herbs were measured (He et al., 2018).

265 Leaves were collected from trees, shrubs, and herbs within the plots. For each species,  
266 more than 20 mature leaves were collected from the top of the canopy of four healthy  
267 individuals and mixed as a composite sample. The leaves were collected from trees using  
268 long-handle shears or handpicked by climbing the trees. About half of the leaves were placed  
269 in sealed plastic bags, immediately stored in a box with ice, and others were used to measure  
270 leaf morphological traits (Li et al., 2018).

271 After sampling, leaf size was measured using a scanner (Cano Scan LIDE 100, Japan)  
272 and Photoshop CS software (Adobe, United States). These leaves were subsequently dried to  
273 constant mass in an oven before measuring leaf dry mass, and specific leaf area as the ratio of  
274 leaf area to leaf dry mass. Eight to ten leaves from the pooled sample were cut into small

275 pieces ( $1.0 \times 0.5$  cm) along the main vein and were fixed in 75% alcohol: formalin: glacial  
276 acetic acid: glycerin (90:5:5:5).

277 Stomatal traits were imaged using a scanning electron microscope (S-3400N, Hitachi,  
278 Japan), using the same leaf samples as previously studied for stomatal density, size and  
279 stomatal area fraction (Liu et al., 2018). Three small pieces were selected from the pooled  
280 sample, and each replicate was photographed twice on the lower surface at different positions.  
281 Given our use of scanning electron microscopy and investigation of a large number of species  
282 across communities, the labor and expense did not allow measurements of the upper  
283 epidermis, and we focused on the lower epidermis (Liu et al., 2019). The herbaceous species  
284 in closed forests typically have more stomata on their adaxial surfaces, whereas trees and  
285 shrubs tend to have few or no stomata on the adaxial surface (Muir, 2015; Muir, 2018). Thus,  
286 sampling only the lower epidermis results in some uncertainty, but the community level  
287 findings are expected to be robust.

288 The number of stomata in each photograph was recorded, and stomatal density (SD) was  
289 calculated as the number of stomata per unit area (Liu et al., 2018). In each photograph, five  
290 typical stomata were selected to measure stomatal length (SL), stomatal pore length (PL), and  
291 stomatal width (SW) by using MIPS (Optical Instrument Co., Ltd., Chongqing, China). We  
292 used the above stomatal traits to calculate  $f$  and  $g$  (Franks and Farquhar, 2001).

$$f = \frac{\pi}{4} \cdot SD \cdot SW \cdot SL$$
$$g = SD \cdot \left( \frac{D_w}{v} \right) \cdot \frac{a_{\max}}{l + 0.5 \cdot (\pi \cdot a_{\max})^{0.5}}$$

293 where  $D_w$  is the diffusivity of water in air,  $v$  is the molar volume of water vapor,  $a_{\max}$  is the  
294 maximum pore area (estimated as the area of the ellipse with major axis PL and minor axis

295 0.5PL), and  $l$  is the depth of the stomatal pore, which was approximated as guard cell width.

296 We then calculated  $e$  as the ratio of  $g$  to  $f$ . Notably,  $e$  depends inversely on stomatal size,

297 because smaller stomata, having shorter depths, are more efficient for transport for a given

298 pore area (Franks and Farquhar, 2006); the mathematical relationships of  $e$  to stomatal size is

299 presented in Supplementary Note 1.

300

### 301 **Stomatal trait moments of plant communities**

302 To scale up traits to the community scale, and given that stomatal traits were normalized by

303 leaf area, we used the total leaf area of each species in the plot to weight species trait values,

304 and then calculated the distributions of stomatal traits. The total leaf biomass of each

305 individual tree and shrub was calculated using species-specific allometric regressions based

306 on measured values of height, diameter at breast height (DBH) or basal stem diameter, and

307 then the leaf biomass of each species within plots was calculated. Species-specific allometric

308 regressions were obtained from the Chinese Ecosystem Research Network (Wang et al., 2015).

309 The leaf biomass of herbs was measured using the harvest method. The total leaf area of each

310 species was calculated as the product of total leaf biomass and specific leaf area.

311 Community-weighted mean, variance, skewness, and kurtosis were calculated as follows

312 (Gross et al., 2017; Wiczyński et al., 2019):

$$\begin{aligned}\text{Mean} &= \sum_1^n p_i \text{Trait}_i \\ \text{Variance} &= \sum_1^n p_i (\text{Trait}_i - \text{Mean})^2 \\ \text{Skewness} &= \sum_1^n \frac{p_i (\text{Trait}_i - \text{Mean})^3}{\text{Variance}^{\frac{3}{2}}}\end{aligned}$$

$$\text{Kurtosis} = \sum_1^n \frac{p_i (\text{Trait}_i - \text{Mean})^4}{\text{Variance}^2}$$

313

314

where  $n$  is the species richness,  $p_i$  is the proportion of leaf area of  $i^{\text{th}}$  plant species in a specific community, and  $\text{Trait}_i$  represents stomatal traits ( $g$ ,  $f$ , or  $e$ ) of the  $i^{\text{th}}$  plant species.

315

316

317

318

319

320

321

The community trait variance, skewness, and kurtosis provide information beyond the community weighted mean, which can over-emphasize the role of dominant species (Enquist et al., 2015). Specifically, the community variance in a given traits represents the functional divergence, skewness the extent of asymmetric distribution of traits, and kurtosis the functional evenness, with a high kurtosis indicating strong trait optimization (Umaña et al., 2021). Skewness and kurtosis are mathematically related, according to skewness-kurtosis relationships (SKR):

$$\text{Kurtosis} \geq \text{Skewness}^2 + 1$$

322

323

Thus, for a given skewness, there is a minimum kurtosis. Here, we calculated the distance between the observed kurtosis and minimum kurtosis (D):

$$D = \text{Kurtosis} - (\text{Skewness}^2 + 1)$$

324

325

D signifies the extent to which functional diversity is maximized, with a  $D = 0$  representing the strongest possible maximization of functional diversity (Gross et al., 2017).

326

### 327 **Climate data and ecosystem productivity**

328

329

330

Mean annual temperature and precipitation (MAT and MAP, respectively) were derived from the Resource and Environment Data Cloud Platform (<http://www.resdc.cn/>). Then, the de Martonne aridity index (de Martonne, 1926) was calculated the ratio of MAP and  $\text{MAT}+10$ .



331

To facilitate the interpretation of results, we calculated the climatic aridity index for each site  
332  
as:

$$CI = 100 - \frac{MAP}{MAT + 10}$$

333

so all the CI values were positive, and higher values of this aridity level indicate drier  
334  
conditions.

335

In these forests, gross primary productivity and net primary productivity were strongly  
336  
correlated with each other across sites (Li et al., 2020); here, we focused on gross primary  
337  
productivity (GPP). The average GPP data from 2000 to 2015 (Li et al., 2020) were obtained  
338  
from the Numerical Terradynamic Simulation Group  
(<http://www.ntsug.umt.edu/project/modis/mod17.php>). This dataset was derived from a widely  
340  
used Moderate Resolution Imaging Spectroradiometer product, and was calculated using the  
341  
C5 MOD17 algorithm with data validation from flux towers (Li et al., 2020; Zhao and Running,  
342  
2010; Zhao et al., 2005).

343

#### 344 **Data analysis**

345

We calculated statistical moments for stomatal traits, including mean, variance, skewness, and  
346  
kurtosis, for each of the 32 plant community plots. We tested whether to consider plots  
347  
independently, rather than as nested within sites, for calculating community scale moments by  
348  
comparing fixed effects models (*lm* function in R) and mixed effects models (*lmer* function  
349  
from R package *lme4*). The fixed model considered plots as independent, and the mixed  
350  
effects models, considered plots as a random factor nested within each site. Akaike  
351  
information criterion (AIC) represented the support of the model by data, with the model

352

353 having a lower AIC value more likely to underlie the data (Burnham and Anderson, 2004). The  
354 AIC values of fixed and mixed effects models were compared, with differences greater than 2  
355 considered decisive in selecting one model over another, representing a >100 times higher  
356 likelihood that the data were generated by that model. For 12 of the 13 relationships of traits  
357 with climate or ecosystem productivity tested in this study, the fixed effects model was  
358 selected (Table S1-S5). Thus, in our analyses, we considered each plot as a sample plant  
359 community.

360 Spearman rank correlation was used to test relationships between stomatal trait moments  
361 and climate variables. Ordinary least square regression was used to quantify relationships  
362 between statistical moments of stomatal traits, including the relationship between skewness<sup>2</sup>  
363 and kurtosis, and relationship between variance and kurtosis. To explore whether climatic  
364 aridity mediated the relationships between variance and kurtosis, plant communities were  
365 classified into wet and dry communities (threshold CI=40), and scatter diagrams of variance  
and kurtosis were plotted.

366 Focusing on the distance to the minimal kurtosis (D) enables resolution of variation  
367 across communities in trait evenness (Gross et al., 2021), and a test of the hypothesis that  
368 functional niche differentiation of  $g$  would be greater in drier communities, by determining  
369 the correlation between the distance to the minimal kurtosis (D) and climatic aridity. To  
370 clarify whether trait assembly of stomata would maximize stomatal trait diversity, we tested  
371 whether observed skewness-kurtosis relationships (SKRs) differed from random expectations,  
372 which can reveal the signature of niche differentiation in shaping ecological communities  
373 (Gross et al., 2021). We constructed two null models, and predictions from each null model

374 were derived from 2000 randomizations. In the first null model, we randomized the stomatal  
375 traits across all species, using the function “richness” in the R package PICANTE (Kembel et  
376 al., 2010). In the second null model, we shuffled stomatal traits across species occurring in  
377 each community, using the function “independentswap” in the R package PICANTE. These  
378 two null models have been the most common for analyzing community assembly, with the  
379 second null model more specific in its implication. The first null model allows tests for  
380 maximizing trait diversity locally, relative to a scenario of random selection of species from  
381 the regional pool. The second null model allows tests for maximizing trait diversity locally  
382 relative to a scenario of random selection of species from local pools. Stomatal trait moments  
383 were then calculated for each of the 2000 randomizations, for each of the null models used.  
384 Then, we assessed whether the observed SKR significantly differed from  $SKR_{\text{random}}$ . Monte  
385 Carlo analysis was used to test whether the observed SKRs differed from random expectations.  
386 We compared the observed slope  $\beta$  and intercept  $\alpha$  ( $\beta_{\text{obs}}$  and  $\alpha_{\text{obs}}$ , respectively) of the SKR  
387 with those generated by null models ( $\beta_{\text{random}}$  and  $\alpha_{\text{random}}$ , respectively). Three Pseudo P values  
388 were calculated:  $P(\beta|\alpha)$ , the frequency of  $\beta_{\text{obs}} > \beta_{\text{random}}$  within subset  $\alpha_{\text{obs}} < \alpha_{\text{random}}$ ;  $P(\alpha|\beta)$ , the  
389 frequency of  $\alpha_{\text{obs}} > \alpha_{\text{random}}$  within subset  $\beta_{\text{obs}} < \beta_{\text{random}}$ ; and  $P(\beta \cap \alpha)$ , the frequency of  $\alpha_{\text{obs}} <$   
390  $\alpha_{\text{random}}$  within subset  $\beta_{\text{obs}} < \beta_{\text{random}}$ . Further, we compared the observed distance to the minimal  
391 kurtosis ( $D_{\text{obs}}$ ) with that generated by null models ( $D_{\text{random}}$ ).  $P(D)$  is the frequency of  $D_{\text{obs}} <$   
392  $D_{\text{random}}$ .

393 A multiple regression model was used to assess the potential influence of stomatal trait  
394 moments on ecosystem productivity, and quadratic terms of stomatal trait moments were also  
395 considered as potential drivers of non-linear effects of these variables on ecosystem

396 productivity. All variables, including ecosystem productivity and stomatal trait moments, were  
397 standardized (Z-scores) before analysis. We first used the “stepAIC” function (MASS package  
398 in R) to exclude less important predictors, then the “dredge” function (MuMIn package in R)  
399 was used to select the best models. Finally, the relative effect of each stomatal trait moment  
400 on ecosystem productivity was calculated as its absolute parameter compared with the sum of  
401 all the absolute parameters in the model.

402 Standardized effect sizes (SES) were used to assess the non-random influence of  
403 stomatal traits on ecosystem productivity. SES was calculated as (Bruehlheide et al., 2018)

$$SES = \frac{Adj. r_{obs}^2 - mean(Adj. r_{null}^2)}{s. d. (Adj. r_{null}^2)}$$

404 where  $Adj. r_{obs}^2$  is the observed influence of stomatal traits on ecosystem productivity,  
405  $Adj. r_{null}^2$  is the influence of stomatal traits on ecosystem productivity of random  
406 communities generated from a null model, *mean* represents the average value, and *s. d.* is  
407 the standard deviation.

408 Data analyses and visualization were performed using R (<http://www.R-project.org/>).

409 Statistical significance was set at the 0.05 level.

410

#### 411 **Author contribution**

412 N.H. planned and designed the research; C.L. and Y.L. conducted fieldwork and collected  
413 data; C.L., L.S. and Y.L. analyzed data and wrote the manuscript; L.S. and C.L. revised the  
414 manuscript.

415

416

#### 417 **Acknowledgements**

418 This work was supported by National Natural Science Foundation of China [31988102,  
419 31770655, 32001186], and the fellowship of China Postdoctoral Science Foundation  
420 (2020M680663). There are no conflicts of interest to declare.

421

422 **Data accessibility**

423 The data that support the findings of this study are available from the corresponding author  
424 upon reasonable request.

425

## 426 **References**

- 427 Beaulieu, J.M., Leitch, I.J., Patel, S., Pendharkar, A., Knight, C.A. (2008). Genome size is a strong predictor of cell  
428 size and stomatal density in angiosperms. *New Phytologist* 179: 975-986
- 429 Bruelheide, H., Dengler, J., Purschke, O., Lenoir, J., Jiménez-Alfaro, B., Hennekens, S.M., Botta-Dukát, Z., Chytrý,  
430 M., Field, R., Jansen, F., et al. (2018). Global trait–environment relationships of plant communities. *Nature*  
431 *Ecology & Evolution* 2: 1906-1917
- 432 Burnham, K.P., Anderson, D.R. (2004). Multimodel inference: Understanding aic and bic in model selection.  
433 *Sociological methods & research* 33: 261-304
- 434 Callaway, R.M. (1995). Positive interactions among plants. *The Botanical Review* 61: 306-349
- 435 De Boer, H.J., Price, C.A., Wagner-Cremer, F., Dekker, S.C., Franks, P.J., Veneklaas, E.J. (2016). Optimal allocation  
436 of leaf epidermal area for gas exchange. *New Phytologist* 210: 1219-1228
- 437 Edwards, D., Kerp, H., Hass, H. (1998). Stomata in early land plants: An anatomical and ecophysiological  
438 approach. *Journal of Experimental Botany* 49: 255-278
- 439 Enquist, B.J., Norberg, J., Bonser, S.P., Violle, C., Webb, C.T., Henderson, A., Sloat, L.L., Savage, V.M. Chapter nine  
440 - scaling from traits to ecosystems: Developing a general trait driver theory via integrating trait-based and  
441 metabolic scaling theories. *Advances in ecological research*, 2015, 52: 249-318,  
442 <http://www.sciencedirect.com/science/article/pii/S0065250415000070>
- 443 Franks, P.J., Farquhar, G.D. (2001). The effect of exogenous abscisic acid on stomatal development, stomatal  
444 mechanics, and leaf gas exchange in *tradescantia virginiana*. *Plant Physiology* 125: 935-942
- 445 Franks, P.J., Farquhar, G.D. (2006). The mechanical diversity of stomata and its significance in gas-exchange  
446 control. *Plant Physiology* 143: 78-87
- 447 Franks, P.J., Beerling, D.J. (2009). Maximum leaf conductance driven by CO<sub>2</sub> effects on stomatal size and density  
448 over geologic time. *Proceedings of the National Academy of Sciences* 106: 10343-10347
- 449 Franks, P.J., W. Doheny-Adams, T., Britton-Harper, Z.J., Gray, J.E. (2015). Increasing water-use efficiency directly  
450 through genetic manipulation of stomatal density. *New Phytologist* 207: 188-195
- 451 Garnier, E., Navas, M.-L. (2012). A trait-based approach to comparative functional plant ecology: Concepts,  
452 methods and applications for agroecology. A review. *Agron Sustain Dev* 32: 365-399
- 453 Garnier, E., Cortez, J., Billès, G., Navas, M.-L., Roumet, C., Debussche, M., Laurent, G., Blanchard, A., Aubry, D.,  
454 Bellmann, A., et al. (2004). Plant functional markers capture ecosystem properties during secondary succession.  
455 *Ecology* 85: 2630-2637
- 456 Griffin-Nolan, R.J., Bushey, J.A., Carroll, C.J.W., Challis, A., Chieppa, J., Garbowski, M., Hoffman, A.M., Post, A.K.,  
457 Slette, I.J., Spitzer, D., et al. (2018). Trait selection and community weighting are key to understanding  
458 ecosystem responses to changing precipitation regimes. *Functional Ecology* 32: 1746-1756
- 459 Grime, J.P. (1998). Benefits of plant diversity to ecosystems: Immediate, filter and founder effects. *Journal of*  
460 *Ecology* 86: 902-910
- 461 Gross, N., Bagousse-Pinguet, Y.L., Liancourt, P., Berdugo, M., Gotelli, N.J., Maestre, F.T. (2017). Functional trait  
462 diversity maximizes ecosystem multifunctionality. *Nature Ecology & Evolution* 1: 0132
- 463 Gross, N., Le Bagousse-Pinguet, Y., Liancourt, P., Saiz, H., Violle, C., Munoz, F. (2021). Unveiling ecological  
464 assembly rules from commonalities in trait distributions. *Ecology Letters* n/a:
- 465 Grossiord, C. (2020). Having the right neighbors: How tree species diversity modulates drought impacts on  
466 forests. *New Phytologist* 228: 42-49
- 467 Grubb, P.J. (1998). A reassessment of the strategies of plants which cope with shortages of resources.  
468 *Perspectives in Plant Ecology, Evolution and Systematics* 1: 3-31
- 469 Haworth, M., Elliott-Kingston, C., Mcelwain, J.C. (2011). Stomatal control as a driver of plant evolution. *Journal*

470 of *Experimental Botany* 62: 2419-2423

471 Haworth, M., Scutt, C.P., Douthe, C., Marino, G., Gomes, M.T.G., Loreto, F., Flexas, J., Centritto, M. (2018).

472 Allocation of the epidermis to stomata relates to stomatal physiological control: Stomatal factors involved in the

473 evolutionary diversification of the angiosperms and development of amphistomaty. *Environmental and*

474 *Experimental Botany* 151: 55-63

475 He, N., Liu, C., Tian, M., Li, M., Yang, H., Yu, G., Guo, D., Smith, M.D., Yu, Q., Hou, J. (2018). Variation in leaf

476 anatomical traits from tropical to cold-temperate forests and linkage to ecosystem functions. *Functional Ecology*

477 32: 10-19

478 He, N., Liu, C., Piao, S., Sack, L., Xu, L., Luo, Y., He, J., Han, X., Zhou, G., Zhou, X., et al. (2019). Ecosystem traits

479 linking functional traits to macroecology. *Trends in Ecology & Evolution* 34: 200-210

480 He, N., Li, Y., Liu, C., Xu, L., Li, M., Zhang, J., He, J., Tang, Z., Han, X., Ye, Q., et al. (2020). Plant trait networks:

481 Improved resolution of the dimensionality of adaptation. *Trends in Ecology & Evolution* 35: 908-918

482 Hetherington, A.M., Woodward, F.I. (2003). The role of stomata in sensing and driving environmental change.

483 *Nature* 424: 901-908

484 Holland, N., Richardson, A.D. (2009). Stomatal length correlates with elevation of growth in four temperate

485 species. *Journal of Sustainable Forestry* 28: 63-73

486 Hooper, D.U. (1998). The role of complementarity and competition in ecosystem responses to variation in plant

487 diversity. *Ecology* 79: 704-719

488 Hooper, D.U., Chapin III, F.S., Ewel, J.J., Hector, A., Inchausti, P., Lavorel, S., Lawton, J.H., Lodge, D.M., Loreau, M.,

489 Naeem, S., et al. (2005). Effects of biodiversity on ecosystem functioning: A consensus of current knowledge.

490 *Ecological Monographs* 75: 3-35

491 Jordan, G.J., Carpenter, R.J., Koutoulis, A., Price, A., Brodribb, T.J. (2015). Environmental adaptation in stomatal

492 size independent of the effects of genome size. *New Phytologist* 205: 608-617

493 Kembel, S.W., Cowan, P.D., Helmus, M.R., Cornwell, W.K., Morlon, H., Ackerly, D.D., Blomberg, S.P., Webb, C.O.

494 (2010). Picante: R tools for integrating phylogenies and ecology. *Bioinformatics* 26: 1463-1464

495 Kraft, N.J., Valencia, R., Ackerly, D.D. (2008). Functional traits and niche-based tree community assembly in an

496 amazonian forest. *Science* 322: 580-582

497 Le Bagousse-Pinguet, Y., Gross, N., Maestre, F.T., Maire, V., De Bello, F., Fonseca, C.R., Kattge, J., Valencia, E.,

498 Leps, J., Liancourt, P. (2017). Testing the environmental filtering concept in global drylands. *Journal of Ecology*

499 105: 1058-1069

500 Li, Y., Liu, C., Zhang, J., Yang, H., Xu, L., Wang, Q., Sack, L., Wu, X., Hou, J., He, N. (2018). Variation in leaf

501 chlorophyll concentration from tropical to cold-temperate forests: Association with gross primary productivity.

502 *Ecological Indicators* 85: 383-389

503 Li, Y., Reich, P.B., Schmid, B., Shrestha, N., Feng, X., Lyu, T., Maitner, B.S., Xu, X., Li, Y., Zou, D., et al. (2020). Leaf

504 size of woody dicots predicts ecosystem primary productivity. *Ecology Letters* 23: 1003-1013

505 Liu, C., Li, Y., Xu, L., Chen, Z., He, N. (2019). Variation in leaf morphological, stomatal, and anatomical traits and

506 their relationships in temperate and subtropical forests. *Scientific Reports* 9: 5803

507 Liu, C., Li, Y., Zhang, J., Baird, A.S., He, N. (2020). Optimal community assembly related to leaf economic-

508 hydraulic-anatomical traits. *Frontiers in Plant Science* 11:

509 Liu, C., He, N., Zhang, J., Li, Y., Wang, Q., Sack, L., Yu, G. (2018). Variation of stomatal traits from cold temperate

510 to tropical forests and association with water use efficiency. *Functional Ecology* 32: 20-28

511 Loreau, M. (2000). Biodiversity and ecosystem functioning: Recent theoretical advances. *Oikos* 91: 3-17

512 McElwain, J.C., Yiotis, C., Lawson, T. (2016). Using modern plant trait relationships between observed and

513 theoretical maximum stomatal conductance and vein density to examine patterns of plant macroevolution.

514 New Phytologist 209: 94-103

515 Mensah, S., Salako, K.V., Assogbadjo, A., Kakai, R.G., Sinsin, B., Seifert, T. (2020). Functional trait diversity is a  
516 stronger predictor of multifunctionality than dominance: Evidence from an afro-montane forest in south africa.  
517 Ecological Indicators 115: 106415

518 Muir, C.D. (2015). Making pore choices: Repeated regime shifts in stomatal ratio. Proceedings of the Royal  
519 Society B: Biological Sciences 282: 20151498

520 Muir, C.D. (2018). Light and growth form interact to shape stomatal ratio among british angiosperms. New  
521 Phytologist 218: 242-252

522 Murray, M., Soh, W.K., Yiotis, C., Spicer, R.A., McElwain, J.C. (2019). Consistent relationship between  
523 field-measured stomatal conductance and theoretical maximum stomatal conductance in c3 woody  
524 angiosperms in four major biomes. International Journal of Plant Sciences 181: 142-154

525 Muscarella, R., Uriarte, M. (2016). Do community-weighted mean functional traits reflect optimal strategies?  
526 Proceedings of the Royal Society B: Biological Sciences 283: 20152434

527 Naeem, S., Thompson, L.J., Lawler, S.P., Lawton, J.H., Woodfin, R.M. (1994). Declining biodiversity can alter the  
528 performance of ecosystems. Nature 368: 734-737

529 Oram, N.J., Ravenek, J.M., Barry, K.E., Weigelt, A., Chen, H., Gessler, A., Gockele, A., De Kroon, H., Van Der  
530 Paauw, J.W., Scherer-Lorenzen, M., et al. (2018). Below-ground complementarity effects in a grassland  
531 biodiversity experiment are related to deep-rooting species. Journal of Ecology 106: 265-277

532 Raven, J.A. (2002). Selection pressures on stomatal evolution. New Phytologist 153: 371-386

533 Reichstein, M., Bahn, M., Mahecha, M.D., Kattge, J., Baldocchi, D.D. (2014). Linking plant and ecosystem  
534 functional biogeography. Proceedings of the National Academy of Sciences 111: 13697-13702

535 Sack, L., Buckley, T.N. (2016). The developmental basis of stomatal density and flux. Plant Physiology 171:  
536 2358-2363

537 Sack, L., Cowan, P.D., Jaikumar, N., Holbrook, N.M. (2003). The 'hydrology' of leaves: Co-ordination of structure  
538 and function in temperate woody species. Plant, Cell & Environment 26: 1343-1356

539 Schumacher, J., Roscher, C. (2009). Differential effects of functional traits on aboveground biomass in  
540 semi-natural grasslands. Oikos 118: 1659-1668

541 Schwendenmann, L., Pendall, E., Sanchez-Bragado, R., Kunert, N., Hölscher, D. (2015). Tree water uptake in a  
542 tropical plantation varying in tree diversity: Interspecific differences, seasonal shifts and complementarity.  
543 Ecohydrology 8: 1-12

544 Scoffoni, C., Rawls, M., Mckown, A., Cochard, H., Sack, L. (2011). Decline of leaf hydraulic conductance with  
545 dehydration: Relationship to leaf size and venation architecture. Plant Physiology 156: 832-843

546 Siddiq, Z., Chen, Y.-J., Zhang, Y.-J., Zhang, J.-L., Cao, K.-F. (2017). More sensitive response of crown conductance  
547 to vpd and larger water consumption in tropical evergreen than in deciduous broadleaf timber trees.  
548 Agricultural and Forest Meteorology 247: 399-407

549 Taylor, S.H., Franks, P.J., Hulme, S.P., Spriggs, E., Christin, P.A., Edwards, E.J., Woodward, F.I., Osborne, C.P. (2012).  
550 Photosynthetic pathway and ecological adaptation explain stomatal trait diversity amongst grasses. New  
551 Phytologist 193: 387-396

552 Umaña, M.N., Arellano, G., Swenson, N.G., Zambrano, J. (2021). Tree seedling trait optimization and growth in  
553 response to local-scale soil and light variability. Ecology 102: e03252

554 Wang, H., Prentice, I.C., Keenan, T.F., Davis, T.W., Wright, I.J., Cornwell, W.K., Evans, B.J., Peng, C. (2017).  
555 Towards a universal model for carbon dioxide uptake by plants. Nature Plants 3: 734-741

556 Wang, R., Yu, G., He, N., Wang, Q., Zhao, N., Xu, Z., Ge, J. (2015). Latitudinal variation of leaf stomatal traits from  
557 species to community level in forests: Linkage with ecosystem productivity. Scientific Reports 5: 14454



558 West, A.G., Dawson, T.E., February, E.C., Midgley, G.F., Bond, W.J., Aston, T.L. (2012). Diverse functional  
559 responses to drought in a mediterranean-type shrubland in south africa. *New Phytologist* 195: 396-407  
560 Wieczynski, D.J., Boyle, B., Buzzard, V., Duran, S.M., Henderson, A.N., Hulshof, C.M., Kerkhoff, A.J., Mccarthy,  
561 M.C., Michaletz, S.T., Swenson, N.G., et al. (2019). Climate shapes and shifts functional biodiversity in forests  
562 worldwide. *Proceedings of the National Academy of Sciences* 116: 587-592  
563 Xiong, D., Flexas, J. (2020). From one side to two sides: The effects of stomatal distribution on photosynthesis.  
564 *New Phytologist* 228: 1754-1766  
565 Zhang, D., Peng, Y., Li, F., Yang, G., Wang, J., Yu, J., Zhou, G., Yang, Y. (2019). Trait identity and functional diversity  
566 co-drive response of ecosystem productivity to nitrogen enrichment. *Journal of Ecology* 107: 2402-2414  
567 Zhao, M., Running, S.W. (2010). Drought-induced reduction in global terrestrial net primary production from  
568 2000 through 2009. *science* 329: 940-943  
569 Zhao, M., Heinsch, F.A., Nemani, R.R., Running, S.W. (2005). Improvements of the modis terrestrial gross and  
570 net primary production global data set. *remote sensing of environment* 95: 164-176  
571

572

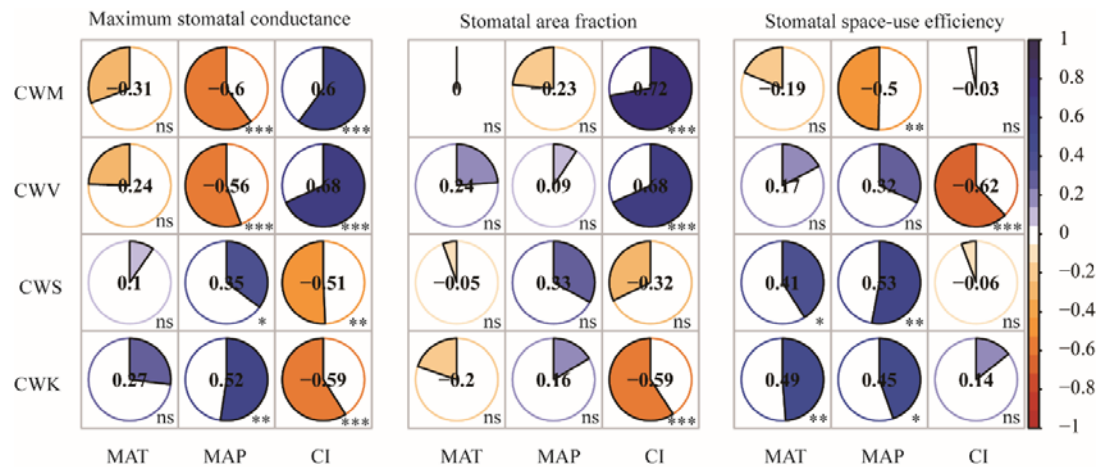

573

574 **Fig. 1 Stomatal trait moments are broadly related to climatic aridity.**

575 CWM, community-weighted mean; CWV, community-weighted variance; CWS,

576 community-weighted skewness; CWK, community-weighted kurtosis

577 MAT, mean annual temperature; MAP, mean annual precipitation; CI, climatic aridity index;

578 Spearman rank correlation coefficients are shown in the panels.

579 Fan-shaped areas are proportional to the absolute Spearman rank correlation coefficients;

580 negative correlations are drawn with a counterclockwise fan and positive correlations with a

581 clockwise fan. The strength of negative correlation increases from white to red, and the

582 strength of positive correlation increases from white to blue.

583

584 ns, no significance at the 0.05 level; \*,  $p < 0.05$ ; \*\*,  $p < 0.01$ ; \*\*\*,  $p < 0.001$ .

585

586

587

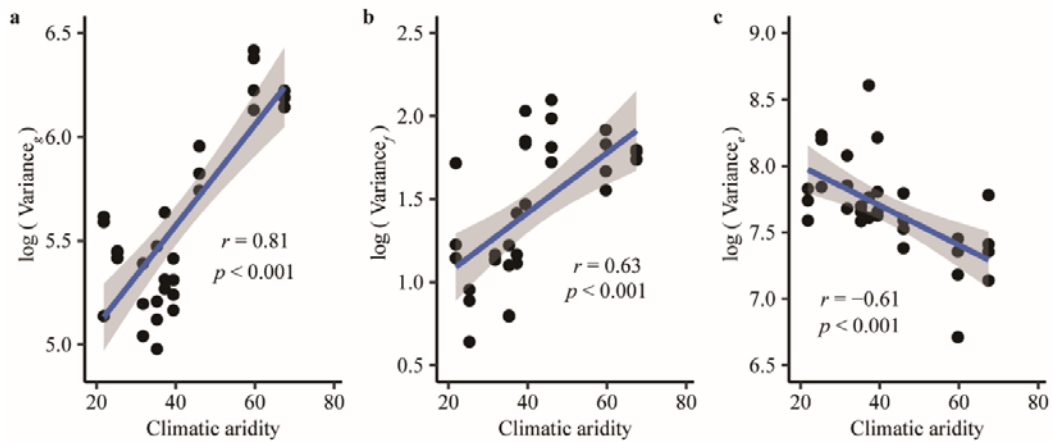

588

589

590 **Fig. 2 Relationships between the community-weighted variance of stomatal traits and**  
591 **climatic aridity**

592 Variance, community-weighted variance.

593  $g$ , maximum stomatal conductance;  $f$ , stomata area fraction;  $e$ , stomatal space-use efficiency.

594 The blue lines are fitted using linear regression, and shaded areas indicate the 95% confidence  
595 interval.

596

597

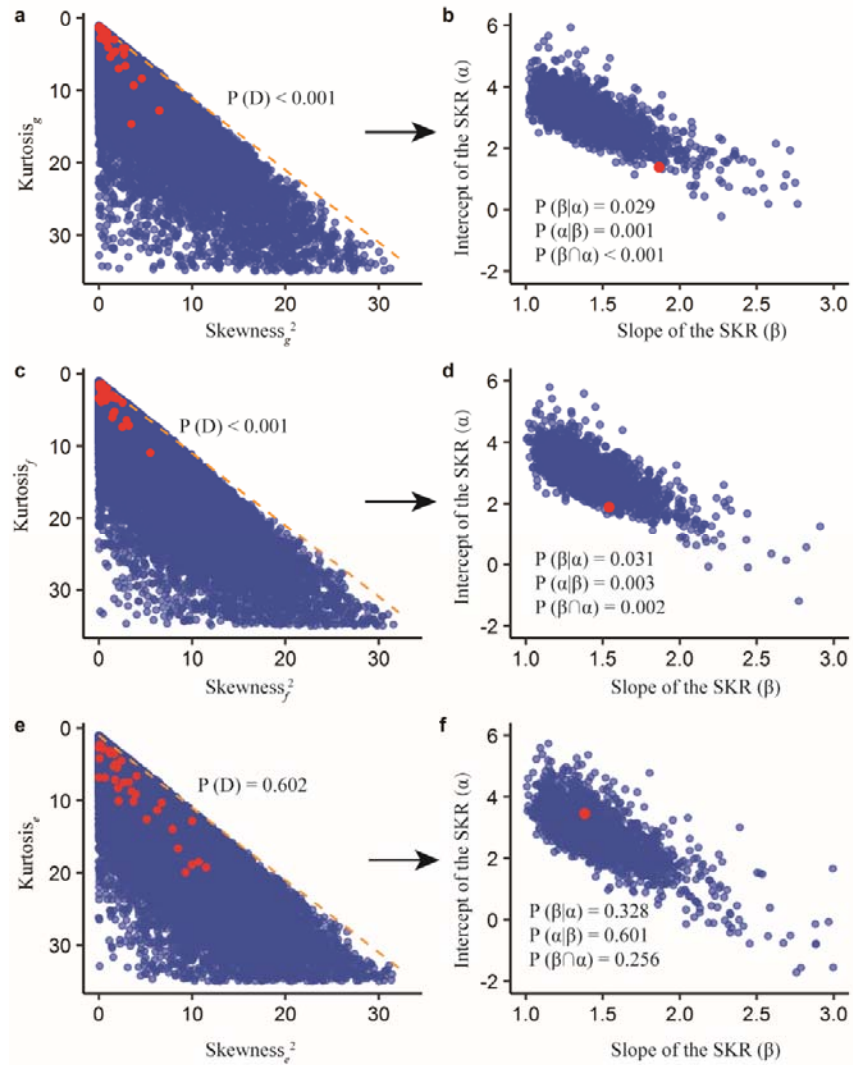

598

599 **Fig. 3 Observed skewness-kurtosis relationships (SKR) and deviation from null**  
 600 **expectations.**

601 Skewness, community-weighted skewness; Kurtosis, community-weighted kurtosis.

602  $g$ , maximum stomatal conductance;  $f$ , stomatal area fraction;  $e$ , stomatal space-use efficiency.

603 The red dots in the left panels represent the observed skewness and kurtosis values; blue dots

604 in the left panels represent the skewness and kurtosis values of simulated random

605 communities. The orange line represents  $y = x + 1$ .

606 Red/blue dots in the right panels represent the observed/random slope ( $\alpha$ ) and intercept

607 ( $\beta$ ) of the SKRs. We indicate the conditional pseudo P values from null model ‘richness’ for

608 the slope  $\beta$ ,  $P(\beta | \alpha)$ , the y-intercept  $\alpha$ ,  $P(\alpha | \beta)$ , the whole model,  $P(\beta \cap \alpha)$  and the distance to

609 the lower boundary,  $P(D)$  (see Table S6 for details).

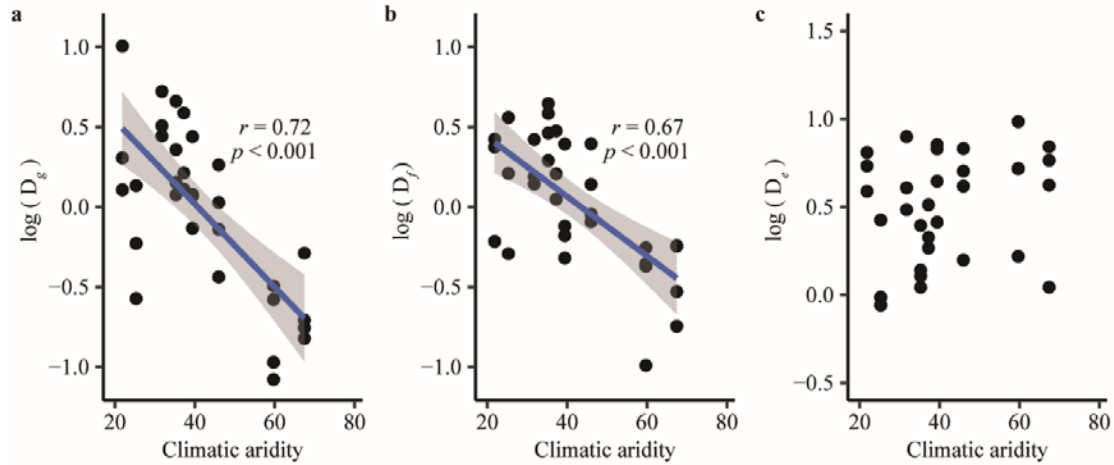

610

611 **Fig. 4 Relationships between the distance to the lower boundary (D) and climatic aridity.**

612  $g$ , maximum stomatal conductance;  $f$ , stomatal area fraction;  $e$ , stomatal space-use efficiency.

613 The blue lines were fitted using linear regression and the shaded areas indicate the 95%

614 confidence interval.

615

616

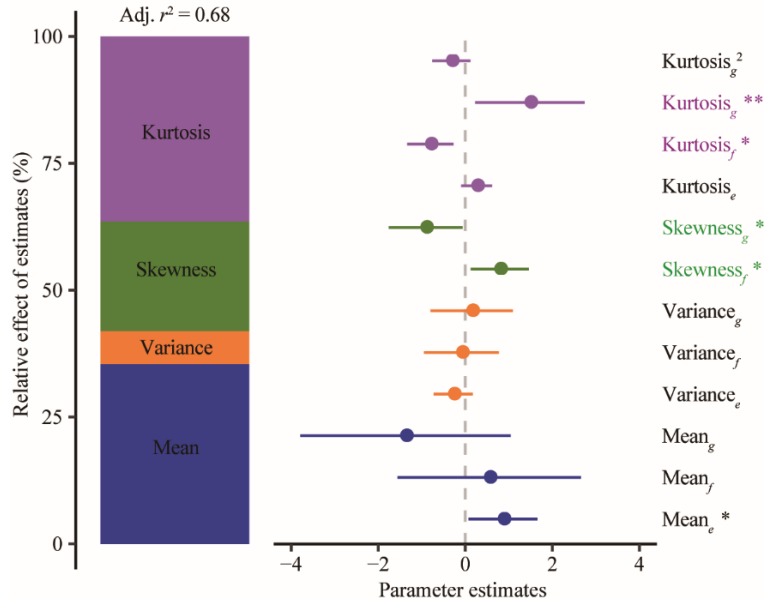

617

618

619 **Fig. 5 Community-weighted skewness and kurtosis of  $g$  and  $f$  showed opposite effects on**  
620 **ecosystem productivity.**

621 Mean, community-weighted mean; Variance, community-weighted variance; Skewness,  
622 community-weighted skewness; Kurtosis, community-weighted kurtosis.

623  $g$ , maximum stomatal conductance;  $f$ , stomatal area fraction;  $e$ , stomatal space-use efficiency.

624 Average parameter estimates (standardized regression coefficients) of model predictors,  
625 associated 95% confidence intervals, and relative importance of each factor, expressed as the  
626 percentage of explained variance.

627 The adjusted  $r^2$  of the averaged model and the  $p$  value of each predictor are given as: \*,  $p <$   
628 0.05; \*\*,  $p < 0.01$ . Colored labels in the right highlighted the different effects of  $g$  and  $f$  on  
629 ecosystem productivity.

630

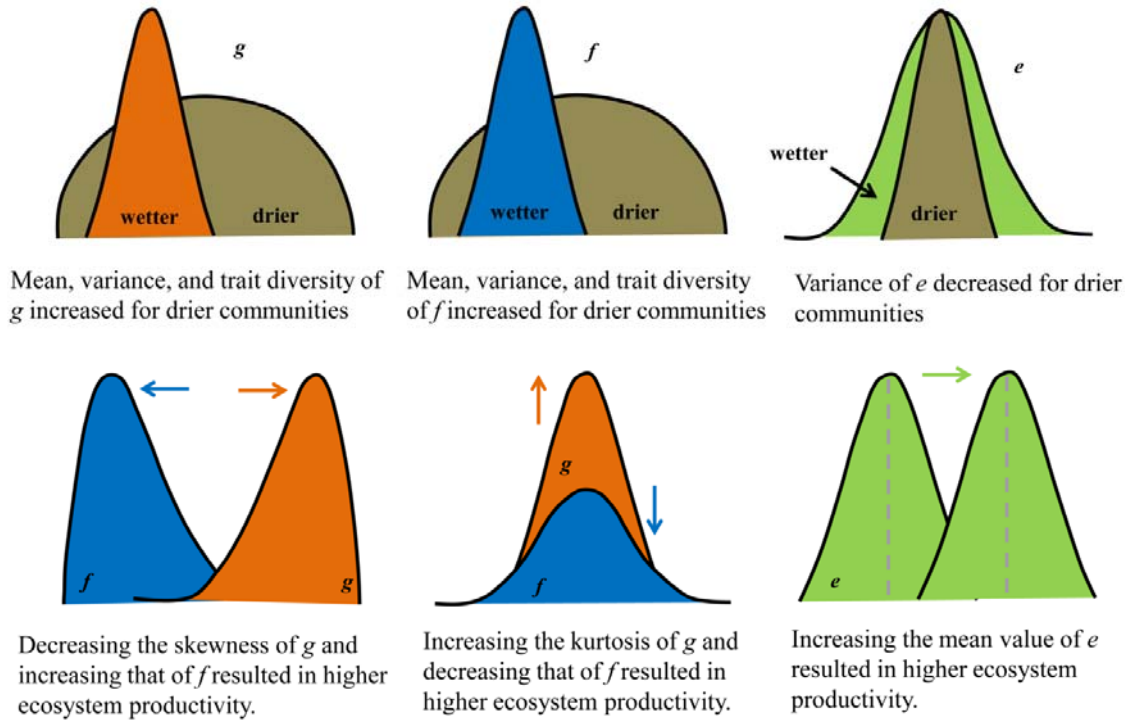

631

632 **Fig. 6 Conceptual diagrams of how stomatal trait distributions adapt drought stress and**  
633 **regulate ecosystem productivity.**

634  $g$ , maximum stomatal conductance, shown by orange;  $f$ , stomatal area fraction, shown by blue;

635  $e$ , stomatal space-use efficiency, shown by green.

636
